# Supplementary material for: APOE-ɛ4 effects on longitudinal decline in olfactory and non-olfactory cognitive abilities in middle-aged and old adults
Source: PubMed Central journal article supplement (PMC5430873; doi:10.1038/s41598-017-01508-7), 2017-04-28
Supplement: 41598_2017_1508_MOESM1_ESM.pdf [file 41598_2017_1508_MOESM1_ESM.pdf]

## Supplementary information

### APOE- $\epsilon$ 4 and longitudinal decline in olfactory and non-olfactory cognitive outcomes in middle-aged and old adults

Maria Josefsson, Maria Larsson, Steven Nordin, Rolf Adolfsson, Jonas Olofsson

**Table S1:** Parameter estimates from the logistic regression model of the middle-aged participants. We used the complete set of enrolled participants who completed APOE genotyping, non-carriers: n=530,  $\epsilon$  4 heterozygotes: n=223,  $\epsilon$  4/4 homozygotes: n=20. The outcome of the model is whether or not the participant completed the olfactory and cognitive testing at the third test wave.

|                                  | <b>Estimate</b> | <b>Std. Error</b> | <b>p-value</b> |
|----------------------------------|-----------------|-------------------|----------------|
| <b>Intercept</b>                 | 1.327           | 0.179             | <0.001         |
| <b>Test experience</b>           | 0.697           | 0.230             | 0.002          |
| <b>Male</b>                      | 0.152           | 0.208             | 0.464          |
| <b>Education</b>                 | 0.064           | 0.125             | 0.605          |
| <b>MMSE</b>                      | 0.068           | 0.104             | 0.517          |
| <b>EMS</b>                       | 0.116           | 0.122             | 0.342          |
| <b>SRB</b>                       | 0.201           | 0.116             | 0.085          |
| <b>Age</b>                       | -0.046          | 0.122             | 0.703          |
| <b><math>\epsilon</math> 4</b>   | 0.112           | 0.227             | 0.623          |
| <b><math>\epsilon</math> 4/4</b> | 0.155           | 0.652             | 0.813          |

**Table S2:** Parameter estimates from the logistic regression model of the old participants using the complete set of enrolled participants who completed APOE genotyping, non-carriers: n=663,  $\epsilon$  4 heterozygotes: n=268,  $\epsilon$  4/4 homozygotes: n=21. The outcome of the model is whether or not the participant completed the olfactory and cognitive testing at the third test wave.

|                                  | <b>Estimate</b> | <b>Std. Error</b> | <b>p-value</b> |
|----------------------------------|-----------------|-------------------|----------------|
| <b>Intercept</b>                 | -0.085          | 0.141             | 0.545          |
| <b>Test experience</b>           | 1.307           | 0.175             | <0.001         |
| <b>Male</b>                      | -0.009          | 0.156             | 0.954          |
| <b>Education</b>                 | 0.007           | 0.087             | 0.932          |
| <b>MMSE</b>                      | 0.371           | 0.093             | <0.001         |
| <b>EMS</b>                       | 0.500           | 0.106             | <0.001         |
| <b>SRB</b>                       | 0.207           | 0.098             | 0.034          |
| <b>Age</b>                       | -0.683          | 0.090             | <0.001         |
| <b><math>\epsilon</math> 4</b>   | -0.393          | 0.172             | 0.022          |
| <b><math>\epsilon</math> 4/4</b> | -0.497          | 0.497             | 0.317          |

## Sensitivity analysis for unmeasured odor identification at enrollment

Let  $X_e$ , denote the vector of observed covariates and observed non-olfactory cognitive scores at enrollment,  $W$  denote the probability of being observed at wave three, and let  $U_e$  denote the unmeasured odor identification score at enrollment. We further let  $X_3$  denote the measured confounders and cognitive scores at the third wave, and similarly let  $U_3$  be the measured odor identification score at the third wave. Let  $Z$  denote the vector of APOE-group indicator-variables.

Following McCandless et al. (1), we use the factorization

$$P(W, U_e | Z, X_e) = P(W | Z, U_e, X_e)P(U_e | Z, X_e)$$

and model the confounding effect of  $U$  using a logistic regression for the probability of being observed at the third test wave:

$$\text{logit}[P(W = 1|Z, U_e, X_e)] = \beta_0 + \beta_1 X_e + \lambda U_e + \alpha Z$$

and a linear regression model for the unobserved odor identification score at enrollment

$$E(U_e|Z, X_e) = \gamma_0 + \gamma_1 X_e + \omega Z$$

As with other models for unmeasured confounding, the model is non-identifiable and the parameters  $\gamma_0$ ,  $\gamma_1$ ,  $\omega$  and  $\lambda$ , reflects assumptions about the confounding effect of  $U_e$ . We first assume  $(U_e|Z, X_e) = (U_3|Z, X_3)$  in distribution, which reflects as missing at random assumption. Hence, the observed data at the third wave can be used to estimate  $\gamma_0$ ,  $\gamma_1$ , and  $\omega$ . Then we can plug in  $Z$  and  $X_e$  to predict  $E(U_e|Z, X_e)$ . As a third step, simulation proceeds as follows:

1. Sample  $U_e^*$  from  $N(\bar{U}_e, \sigma_{\bar{U}_e})$
2. Fit the following logistic regression model  $\text{logit}[P(W = 1|Z, U_e^*, X_e)] = \beta_0 + \beta_1 X_e + \lambda U_e^* + \alpha Z$ , where  $\lambda$  is either estimated using glm, alternative 1, or set to a fixed value, alternative 2. For the latter, setting  $\lambda$  equal 0.4, reflecting a moderate effect (a stronger effect than using the glm estimate), which is comparable to the parameter estimates of the other non-olfactory cognitive tasks (see Table S1 and Table S2). Noting that  $U_e^*$  as well as the other cognitive tasks are first standardized using the z-transformation for comparability.
3. Estimate the longitudinal models using the simulated weights from step 4.
4. Repeat step 1 – 3  $K$  times.

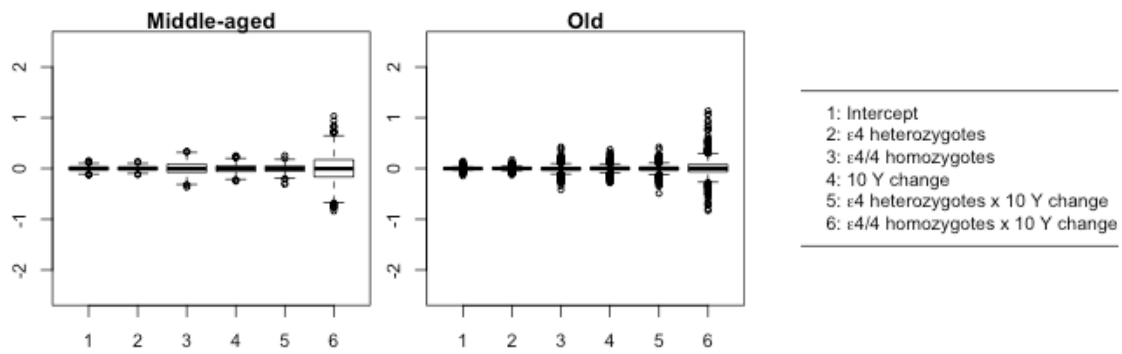

**Fig S1:** Results from the sensitivity analyses for Middle-aged, first column, and Old participants, second column. Showing boxplots of differences in parameter estimates from the mixed models of Odor identification decline, shown in Table 2 and Table 3 of the main document, and estimates from corresponding mixed models when a simulated odor identification score is included in the IPW models (as described in the simulation procedure above using a moderate effect size (alternative 2)).

## References

1. McCandless, L. C., Gustafson, P., & Levy, A. (2007). Bayesian sensitivity analysis for unmeasured confounding in observational studies. *Statistics in medicine*, 26(11), 2331-2347.
